# Supplementary material
Source: publisher figshare collection journal article supplement (https://acs.figshare.com/ndownloader/files/7619071)
Supplement: Supplementary file 1 [file 7619071]

data_1
_audit_creation_date              2015-11-11
_audit_creation_method
;
Olex2 1.2
(compiled 2015.09.30 svn.r3233 for OlexSys, GUI svn.r5103)
;
_publ_contact_author_address      ?
_publ_contact_author_email        ?
_publ_contact_author_name         ''
_publ_contact_author_phone        ?
_publ_section_references
;
Dolomanov, O.V., Bourhis, L.J., Gildea, R.J, Howard, J.A.K. & Puschmann, H.
 (2009), J. Appl. Cryst. 42, 339-341.

Sheldrick, G.M. (2015). Acta Cryst. C71, 3-8.
;
_chemical_name_common             ?
_chemical_name_systematic         ?
_chemical_formula_moiety          '0.5(C96 H64 Co16 N16 O50)'
_chemical_formula_sum             'C48 H32 Co8 N8 O25'
_chemical_formula_weight          1592.25
_chemical_absolute_configuration  ?
_chemical_melting_point           ?
_chemical_oxdiff_formula          'C H O N Co'
loop_
  _atom_type_symbol
  _atom_type_description
  _atom_type_scat_dispersion_real
  _atom_type_scat_dispersion_imag
  _atom_type_scat_source
 'C' 'C' 0.0033 0.0016 'International Tables Vol C Tables 4.2.6.8 and 6.1.1.4'
 'H' 'H' 0.0000 0.0000 'International Tables Vol C Tables 4.2.6.8 and 6.1.1.4'
 'Co' 'Co' 0.3494 0.9721 'International Tables Vol C Tables 4.2.6.8 and 6.1.1.4'
 'N' 'N' 0.0061 0.0033 'International Tables Vol C Tables 4.2.6.8 and 6.1.1.4'
 'O' 'O' 0.0106 0.0060 'International Tables Vol C Tables 4.2.6.8 and 6.1.1.4'

_shelx_space_group_comment
;
The symmetry employed for this shelxl refinement is uniquely defined
by the following loop, which should always be used as a source of
symmetry information in preference to the above space-group names.
They are only intended as comments.
;
_space_group_crystal_system       'tetragonal'
_space_group_IT_number            119
_space_group_name_H-M_alt         'I -4 m 2'
_space_group_name_Hall            'I -4 -2'
loop_
  _space_group_symop_operation_xyz
 'x, y, z'
 '-x, -y, z'
 'y, -x, -z'
 '-y, x, -z'
 'x, -y, z'
 '-x, y, z'
 'y, x, -z'
 '-y, -x, -z'
 'x+1/2, y+1/2, z+1/2'
 '-x+1/2, -y+1/2, z+1/2'
 'y+1/2, -x+1/2, -z+1/2'
 '-y+1/2, x+1/2, -z+1/2'
 'x+1/2, -y+1/2, z+1/2'
 '-x+1/2, y+1/2, z+1/2'
 'y+1/2, x+1/2, -z+1/2'
 '-y+1/2, -x+1/2, -z+1/2'

_cell_length_a                    17.3699(10)
_cell_length_b                    17.3699(10)
_cell_length_c                    19.8944(12)
_cell_angle_alpha                 90
_cell_angle_beta                  90
_cell_angle_gamma                 90
_cell_volume                      6002.4(8)
_cell_formula_units_Z             2
_cell_measurement_reflns_used     2228
_cell_measurement_temperature     293(2)
_cell_measurement_theta_max       26.7730
_cell_measurement_theta_min       3.6980
_shelx_estimated_absorpt_T_max    ?
_shelx_estimated_absorpt_T_min    ?
_exptl_absorpt_coefficient_mu     1.120
_exptl_absorpt_correction_T_max   1.00000
_exptl_absorpt_correction_T_min   0.42980
_exptl_absorpt_correction_type    multi-scan
_exptl_absorpt_process_details
;
CrysAlisPro, Agilent Technologies,
Version 1.171.37.35 (release 13-08-2014 CrysAlis171 .NET)
(compiled Aug 13 2014,18:06:01)
Empirical absorption correction using spherical harmonics,
 implemented in SCALE3 ABSPACK scaling algorithm.
;
_exptl_absorpt_special_details    ?
_exptl_crystal_colour             ?
_exptl_crystal_density_diffrn     0.881
_exptl_crystal_density_meas       ?
_exptl_crystal_density_method     ?
_exptl_crystal_description        ''
_exptl_crystal_F_000              1584
_exptl_crystal_size_max           ?
_exptl_crystal_size_mid           ?
_exptl_crystal_size_min           ?
_exptl_transmission_factor_max    ?
_exptl_transmission_factor_min    ?
_diffrn_reflns_av_R_equivalents   0.0714
_diffrn_reflns_av_unetI/netI      0.0815
_diffrn_reflns_Laue_measured_fraction_full 0.994
_diffrn_reflns_Laue_measured_fraction_max 0.994
_diffrn_reflns_limit_h_max        14
_diffrn_reflns_limit_h_min        -20
_diffrn_reflns_limit_k_max        17
_diffrn_reflns_limit_k_min        -20
_diffrn_reflns_limit_l_max        23
_diffrn_reflns_limit_l_min        -20
_diffrn_reflns_number             9679
_diffrn_reflns_point_group_measured_fraction_full 0.994
_diffrn_reflns_point_group_measured_fraction_max 0.994
_diffrn_reflns_theta_full         24.989
_diffrn_reflns_theta_max          24.989
_diffrn_reflns_theta_min          3.665
_diffrn_ambient_temperature       293(2)
_diffrn_detector                  'CCD plate'
_diffrn_detector_area_resol_mean  5.3031
_diffrn_detector_type             AtlasS2
_diffrn_measured_fraction_theta_full 0.994
_diffrn_measured_fraction_theta_max 0.994
_diffrn_measurement_details
;
#__ type_ start__ end____ width___ exp.time_
  1 omega  -17.00   10.00   1.0000   35.0000
omega____ theta____ kappa____ phi______ frames
    -      -11.7729  -99.0000 -150.0000 27

#__ type_ start__ end____ width___ exp.time_
  2 omega  -61.00   32.00   1.0000   35.0000
omega____ theta____ kappa____ phi______ frames
    -       11.7729  -57.0000   30.0000 93

#__ type_ start__ end____ width___ exp.time_
  3 omega  -28.00    3.00   1.0000   35.0000
omega____ theta____ kappa____ phi______ frames
    -       11.7729   19.0000  -90.0000 31
;
_diffrn_measurement_device        'four-circle diffractometer'
_diffrn_measurement_device_type   'SuperNova, Dual, Cu at zero, AtlasS2'
_diffrn_measurement_method        '\w scans'
_diffrn_orient_matrix_UB_11       -0.0371904000
_diffrn_orient_matrix_UB_12       -0.0119397000
_diffrn_orient_matrix_UB_13       0.0104166000
_diffrn_orient_matrix_UB_21       0.0098991000
_diffrn_orient_matrix_UB_22       0.0078495000
_diffrn_orient_matrix_UB_23       0.0338974000
_diffrn_orient_matrix_UB_31       -0.0136381000
_diffrn_orient_matrix_UB_32       0.0382546000
_diffrn_orient_matrix_UB_33       -0.0037129000
_diffrn_radiation_monochromator   mirror
_diffrn_radiation_probe           x-ray
_diffrn_radiation_type            MoK\a
_diffrn_radiation_wavelength      0.71073
_diffrn_source                    'SuperNova (Mo) X-ray Source'
_reflns_Friedel_coverage          0.851
_reflns_Friedel_fraction_full     0.995
_reflns_Friedel_fraction_max      0.995
_reflns_number_gt                 2135
_reflns_number_total              2825
_reflns_odcompleteness_completeness 99.49
_reflns_odcompleteness_iscentric  1
_reflns_odcompleteness_theta      26.32
_reflns_special_details
;
 Reflections were merged by SHELXL according to the crystal
 class for the calculation of statistics and refinement.
 
 _reflns_Friedel_fraction is defined as the number of unique
 Friedel pairs measured divided by the number that would be
 possible theoretically, ignoring centric projections and
 systematic absences.
;
_reflns_threshold_expression      'I > 2\s(I)'
_computing_cell_refinement
;
CrysAlisPro, Agilent Technologies,
Version 1.171.37.35 (release 13-08-2014 CrysAlis171 .NET)
(compiled Aug 13 2014,18:06:01)
;
_computing_data_collection
;
CrysAlisPro, Agilent Technologies,
Version 1.171.37.35 (release 13-08-2014 CrysAlis171 .NET)
(compiled Aug 13 2014,18:06:01)
;
_computing_data_reduction
;
CrysAlisPro, Agilent Technologies,
Version 1.171.37.35 (release 13-08-2014 CrysAlis171 .NET)
(compiled Aug 13 2014,18:06:01)
;
_computing_molecular_graphics     'Olex2 (Dolomanov et al., 2009)'
_computing_publication_material   'Olex2 (Dolomanov et al., 2009)'
_computing_structure_refinement   'ShelXL (Sheldrick, 2015)'
_computing_structure_solution     ?
_refine_diff_density_max          1.936
_refine_diff_density_min          -0.620
_refine_diff_density_rms          0.124
_refine_ls_abs_structure_details
;
 Flack x determined using 720 quotients [(I+)-(I-)]/[(I+)+(I-)]
 (Parsons, Flack and Wagner, Acta Cryst. B69 (2013) 249-259).
;
_refine_ls_abs_structure_Flack    0.46(3)
_refine_ls_extinction_coef        .
_refine_ls_extinction_method      none
_refine_ls_goodness_of_fit_ref    0.997
_refine_ls_hydrogen_treatment     constr
_refine_ls_matrix_type            full
_refine_ls_number_parameters      132
_refine_ls_number_reflns          2825
_refine_ls_number_restraints      84
_refine_ls_R_factor_all           0.0860
_refine_ls_R_factor_gt            0.0675
_refine_ls_restrained_S_all       0.996
_refine_ls_shift/su_max           0.000
_refine_ls_shift/su_mean          0.000
_refine_ls_structure_factor_coef  Fsqd
_refine_ls_weighting_details
'w=1/[\s^2^(Fo^2^)+(0.1085P)^2^] where P=(Fo^2^+2Fc^2^)/3'
_refine_ls_weighting_scheme       calc
_refine_ls_wR_factor_gt           0.1700
_refine_ls_wR_factor_ref          0.1823
_refine_special_details           ?
_olex2_refinement_description
;
1. Fixed Uiso
 At 1.2 times of:
  All C(H) groups
2. Uiso/Uaniso restraints and constraints
C00H \\sim C9 \\sim C14 \\sim C00G \\sim N008 \\sim C00B: within 2A with sigma
of 0.01 and sigma for terminal atoms of 0.02
C00A \\sim C00F \\sim C00E: within 2A with sigma of 0.01 and sigma for terminal
atoms of 0.02
Uanis(O00) \\sim Ueq: with sigma of 0.001 and sigma for terminal atoms of 0.002
Uanis(O1) \\sim Ueq: with sigma of 0.001 and sigma for terminal atoms of 0.002
3. Others
 Sof(C00G)=Sof(H00G)=Sof(C00H)=Sof(H00H)=1-FVAR(1)
 Sof(C9)=Sof(H9)=Sof(C14)=Sof(H14)=FVAR(1)
4.a Aromatic/amide H refined with riding coordinates:
 C00E(H00E), C00F(H00F), C00G(H00G), C00H(H00H), C9(H9), C14(H14)
;
_atom_sites_solution_hydrogens    geom
_atom_sites_solution_primary      ?
_atom_sites_solution_secondary    ?
loop_
  _atom_site_label
  _atom_site_type_symbol
  _atom_site_fract_x
  _atom_site_fract_y
  _atom_site_fract_z
  _atom_site_U_iso_or_equiv
  _atom_site_adp_type
  _atom_site_occupancy
  _atom_site_site_symmetry_order
  _atom_site_calc_flag
  _atom_site_refinement_flags_posn
  _atom_site_refinement_flags_adp
  _atom_site_refinement_flags_occupancy
  _atom_site_disorder_assembly
  _atom_site_disorder_group
 Co1 Co 0.41124(6) 0.58876(6) 0.0000 0.0251(5) Uani 1 2 d S T P . .
 Co2 Co 0.5000 0.59483(10) 0.44784(9) 0.0283(5) Uani 1 2 d S T P . .
 O4 O 0.5000 0.5796(3) 0.5528(3) 0.0048(15) Uani 1 2 d S TU P . .
 O1 O 0.5000 0.5000 0.0000 0.0121(19) Uani 1 8 d S TU P . .
 O2 O 0.5000 0.6594(4) -0.0257(4) 0.0257(19) Uani 1 2 d S T P . .
 O3 O 0.4359(4) 0.6052(4) 0.1005(3) 0.0397(17) Uani 1 1 d . . . . .
 O5 O 0.5939(4) 0.6632(4) 0.4635(3) 0.0382(17) Uani 1 1 d . . . . .
 N2 N 0.8261(4) 0.8261(4) 0.5000 0.040(2) Uani 1 2 d S TU P . .
 N1 N 0.5000 0.6080(7) 0.3442(5) 0.038(3) Uani 1 2 d S T P . .
 C2 C 0.5000 0.6093(8) 0.2040(5) 0.033(3) Uani 1 2 d S TU P . .
 C6 C 0.7118(5) 0.7118(5) 0.5000 0.034(3) Uani 1 2 d S TU P . .
 C1 C 0.5000 0.6064(7) 0.1293(5) 0.025(2) Uani 1 2 d S T P . .
 C5 C 0.6516(4) 0.6516(4) 0.5000 0.024(2) Uani 1 2 d S T P A .
 C4 C 0.5642(6) 0.6083(9) 0.3090(5) 0.066(3) Uani 1 1 d . U . . .
 H00E H 0.6108 0.6080 0.3321 0.079 Uiso 1 1 calc R . . . .
 C3 C 0.5660(6) 0.6092(8) 0.2389(5) 0.060(3) Uani 1 1 d . U . . .
 H00F H 0.6130 0.6097 0.2164 0.073 Uiso 1 1 calc R . . . .
 C7 C 0.7696(13) 0.7125(12) 0.5493(11) 0.047(4) Uani 0.65(3) 1 d . U . A 1
 H00G H 0.7715 0.6746 0.5823 0.057 Uiso 0.65(3) 1 calc R . . A 1
 C8 C 0.8246(14) 0.7721(12) 0.5474(10) 0.047(4) Uani 0.65(3) 1 d . U . A 1
 H00H H 0.8618 0.7738 0.5810 0.056 Uiso 0.65(3) 1 calc R . . A 1
 C10 C 0.795(2) 0.796(2) 0.5577(18) 0.044(4) Uani 0.35(3) 1 d . U . A 2
 H9 H 0.8093 0.8182 0.5983 0.052 Uiso 0.35(3) 1 calc R . . A 2
 C9 C 0.744(2) 0.737(2) 0.5601(18) 0.044(4) Uani 0.35(3) 1 d . U . A 2
 H14 H 0.7310 0.7138 0.6007 0.052 Uiso 0.35(3) 1 calc R . . A 2

loop_
  _atom_site_aniso_label
  _atom_site_aniso_U_11
  _atom_site_aniso_U_22
  _atom_site_aniso_U_33
  _atom_site_aniso_U_23
  _atom_site_aniso_U_13
  _atom_site_aniso_U_12
 Co1 0.0299(6) 0.0299(6) 0.0154(7) -0.0039(6) -0.0039(6) 0.0066(7)
 Co2 0.0297(10) 0.0393(11) 0.0160(7) 0.0031(8) 0.000 0.000
 O4 0.0048(19) 0.0071(18) 0.0025(18) -0.0004(13) 0.000 0.000
 O1 0.0125(19) 0.0125(19) 0.011(2) 0.000 0.000 0.000
 O2 0.043(5) 0.014(4) 0.020(4) 0.002(3) 0.000 0.000
 O3 0.043(4) 0.054(4) 0.023(3) -0.003(3) -0.001(3) 0.011(3)
 O5 0.042(4) 0.033(4) 0.040(4) 0.004(3) 0.003(3) -0.014(3)
 N2 0.045(4) 0.045(4) 0.030(5) 0.005(4) -0.005(4) -0.004(5)
 N1 0.057(8) 0.042(7) 0.015(4) 0.010(5) 0.000 0.000
 C2 0.031(6) 0.058(8) 0.011(5) 0.001(6) 0.000 0.000
 C6 0.039(4) 0.039(4) 0.025(5) 0.008(4) -0.008(4) -0.013(5)
 C1 0.031(7) 0.028(7) 0.017(5) -0.006(5) 0.000 0.000
 C5 0.026(4) 0.026(4) 0.021(5) 0.005(5) -0.005(5) -0.006(5)
 C4 0.027(5) 0.142(9) 0.030(5) 0.002(6) -0.010(5) -0.010(6)
 C3 0.036(5) 0.119(8) 0.026(4) 0.001(5) 0.005(4) -0.005(5)
 C7 0.051(8) 0.045(7) 0.046(6) 0.011(6) -0.004(7) -0.010(6)
 C8 0.050(8) 0.050(7) 0.041(6) 0.011(6) -0.006(7) -0.012(6)
 C10 0.049(8) 0.048(8) 0.034(7) 0.003(7) -0.004(8) -0.010(7)
 C9 0.048(8) 0.045(8) 0.038(7) 0.004(8) -0.002(8) -0.016(7)

_geom_special_details
;
 All esds (except the esd in the dihedral angle between two l.s. planes)
 are estimated using the full covariance matrix.  The cell esds are taken
 into account individually in the estimation of esds in distances, angles
 and torsion angles; correlations between esds in cell parameters are only
 used when they are defined by crystal symmetry.  An approximate (isotropic)
 treatment of cell esds is used for estimating esds involving l.s. planes.
;
loop_
  _geom_bond_atom_site_label_1
  _geom_bond_atom_site_label_2
  _geom_bond_distance
  _geom_bond_site_symmetry_2
  _geom_bond_publ_flag
 Co1 O1 2.1803(15) . ?
 Co1 O2 2.035(5) 4_655 ?
 Co1 O2 2.035(5) . ?
 Co1 O3 2.064(6) . ?
 Co1 O3 2.064(6) 8_665 ?
 Co1 N2 2.093(11) 11_465 ?
 Co2 O4 2.104(6) . ?
 Co2 O4 2.150(4) 3_566 ?
 Co2 O4 2.150(4) 4_656 ?
 Co2 O5 2.041(6) 6_655 ?
 Co2 O5 2.041(6) . ?
 Co2 N1 2.075(9) . ?
 O4 Co2 2.151(4) 4_656 ?
 O4 Co2 2.151(4) 3_566 ?
 O1 Co1 2.1803(15) 3_565 ?
 O1 Co1 2.1803(15) 4_655 ?
 O1 Co1 2.1803(15) 2_665 ?
 O2 Co1 2.035(5) 3_565 ?
 O3 C1 1.253(8) . ?
 O5 C5 1.254(8) . ?
 N2 Co1 2.093(11) 12_655 ?
 N2 C8 1.330(19) . ?
 N2 C8 1.330(19) 7_556 ?
 N2 C10 1.37(3) 7_556 ?
 N2 C10 1.37(3) . ?
 N1 C4 1.317(11) 6_655 ?
 N1 C4 1.317(11) . ?
 C2 C1 1.486(15) . ?
 C2 C3 1.341(12) . ?
 C2 C3 1.341(12) 6_655 ?
 C6 C5 1.480(16) . ?
 C6 C7 1.40(2) . ?
 C6 C7 1.40(2) 7_556 ?
 C6 C9 1.39(3) . ?
 C6 C9 1.39(3) 7_556 ?
 C1 O3 1.253(8) 6_655 ?
 C5 O5 1.255(8) 7_556 ?
 C4 H00E 0.9300 . ?
 C4 C3 1.396(15) . ?
 C3 H00F 0.9300 . ?
 C7 H00G 0.9300 . ?
 C7 C8 1.41(2) . ?
 C8 H00H 0.9300 . ?
 C10 H9 0.9300 . ?
 C10 C9 1.35(4) . ?
 C9 H14 0.9300 . ?

loop_
  _geom_angle_atom_site_label_1
  _geom_angle_atom_site_label_2
  _geom_angle_atom_site_label_3
  _geom_angle
  _geom_angle_site_symmetry_1
  _geom_angle_site_symmetry_3
  _geom_angle_publ_flag
 O2 Co1 O1 83.71(16) 4_655 . ?
 O2 Co1 O1 83.71(16) . . ?
 O2 Co1 O2 167.4(3) . 4_655 ?
 O2 Co1 O3 90.1(3) . . ?
 O2 Co1 O3 89.2(3) 4_655 . ?
 O2 Co1 O3 89.2(3) . 8_665 ?
 O2 Co1 O3 90.1(3) 4_655 8_665 ?
 O2 Co1 N2 96.29(16) 4_655 11_465 ?
 O2 Co1 N2 96.29(16) . 11_465 ?
 O3 Co1 O1 87.2(2) 8_665 . ?
 O3 Co1 O1 87.2(2) . . ?
 O3 Co1 O3 174.4(4) . 8_665 ?
 O3 Co1 N2 92.8(2) 8_665 11_465 ?
 O3 Co1 N2 92.8(2) . 11_465 ?
 N2 Co1 O1 180.0 11_465 . ?
 O4 Co2 O4 84.8(3) . 3_566 ?
 O4 Co2 O4 84.8(3) . 4_656 ?
 O4 Co2 O4 80.0(2) 4_656 3_566 ?
 O5 Co2 O4 85.5(2) 6_655 . ?
 O5 Co2 O4 86.2(2) 6_655 4_656 ?
 O5 Co2 O4 86.2(2) . 3_566 ?
 O5 Co2 O4 85.5(2) . . ?
 O5 Co2 O4 163.8(3) 6_655 3_566 ?
 O5 Co2 O4 163.8(3) . 4_656 ?
 O5 Co2 O5 106.1(4) 6_655 . ?
 O5 Co2 N1 95.0(3) . . ?
 O5 Co2 N1 95.0(3) 6_655 . ?
 N1 Co2 O4 179.1(4) . . ?
 N1 Co2 O4 94.5(3) . 4_656 ?
 N1 Co2 O4 94.5(3) . 3_566 ?
 Co2 O4 Co2 94.3(2) . 4_656 ?
 Co2 O4 Co2 94.3(2) . 3_566 ?
 Co2 O4 Co2 100.0(2) 4_656 3_566 ?
 Co1 O1 Co1 90.0 4_655 2_665 ?
 Co1 O1 Co1 90.0 3_565 2_665 ?
 Co1 O1 Co1 90.0 . 4_655 ?
 Co1 O1 Co1 180.00(4) 4_655 3_565 ?
 Co1 O1 Co1 90.0 . 3_565 ?
 Co1 O1 Co1 180.0 . 2_665 ?
 Co1 O2 Co1 98.5(3) . 3_565 ?
 C1 O3 Co1 129.1(6) . . ?
 C5 O5 Co2 129.3(6) . . ?
 C8 N2 Co1 120.8(9) . 12_655 ?
 C8 N2 Co1 120.8(9) 7_556 12_655 ?
 C8 N2 C8 118.5(18) 7_556 . ?
 C10 N2 Co1 123.3(14) . 12_655 ?
 C10 N2 Co1 123.3(14) 7_556 12_655 ?
 C10 N2 C10 113(3) . 7_556 ?
 C4 N1 Co2 121.9(5) 6_655 . ?
 C4 N1 Co2 121.9(5) . . ?
 C4 N1 C4 115.8(11) . 6_655 ?
 C3 C2 C1 121.2(5) . . ?
 C3 C2 C1 121.2(5) 6_655 . ?
 C3 C2 C3 117.6(11) . 6_655 ?
 C7 C6 C5 120.8(8) 7_556 . ?
 C7 C6 C5 120.8(8) . . ?
 C7 C6 C7 118.5(17) 7_556 . ?
 C9 C6 C5 120.4(14) 7_556 . ?
 C9 C6 C5 120.4(14) . . ?
 C9 C6 C9 119(3) . 7_556 ?
 O3 C1 O3 125.4(10) . 6_655 ?
 O3 C1 C2 117.3(5) . . ?
 O3 C1 C2 117.3(5) 6_655 . ?
 O5 C5 O5 126.4(10) . 7_556 ?
 O5 C5 C6 116.8(5) . . ?
 O5 C5 C6 116.8(5) 7_556 . ?
 N1 C4 H00E 118.3 . . ?
 N1 C4 C3 123.4(10) . . ?
 C3 C4 H00E 118.3 . . ?
 C2 C3 C4 119.9(10) . . ?
 C2 C3 H00F 120.0 . . ?
 C4 C3 H00F 120.0 . . ?
 C6 C7 H00G 120.9 . . ?
 C6 C7 C8 118.2(16) . . ?
 C8 C7 H00G 120.9 . . ?
 N2 C8 C7 123.3(17) . . ?
 N2 C8 H00H 118.3 . . ?
 C7 C8 H00H 118.3 . . ?
 N2 C10 H9 117.5 . . ?
 C9 C10 N2 125(3) . . ?
 C9 C10 H9 117.5 . . ?
 C6 C9 H14 121.0 . . ?
 C10 C9 C6 118(3) . . ?
 C10 C9 H14 121.0 . . ?

loop_
  _geom_torsion_atom_site_label_1
  _geom_torsion_atom_site_label_2
  _geom_torsion_atom_site_label_3
  _geom_torsion_atom_site_label_4
  _geom_torsion
  _geom_torsion_site_symmetry_1
  _geom_torsion_site_symmetry_2
  _geom_torsion_site_symmetry_3
  _geom_torsion_site_symmetry_4
  _geom_torsion_publ_flag
 Co1 O3 C1 O3 7.7(19) . . . 6_655 ?
 Co1 O3 C1 C2 -172.2(8) . . . . ?
 Co1 N2 C8 C7 -178.8(13) 12_655 . . . ?
 Co1 N2 C10 C9 -175(3) 12_655 . . . ?
 Co2 O5 C5 O5 -1.2(3) . . . 7_556 ?
 Co2 O5 C5 C6 178.8(3) . . . . ?
 Co2 N1 C4 C3 173.3(10) . . . . ?
 N2 C10 C9 C6 -10(5) . . . . ?
 N1 C4 C3 C2 0(2) . . . . ?
 C6 C7 C8 N2 -2(3) . . . . ?
 C1 C2 C3 C4 -177.0(12) . . . . ?
 C5 C6 C7 C8 -178.9(12) . . . . ?
 C5 C6 C9 C10 -175(2) . . . . ?
 C4 N1 C4 C3 0(3) 6_655 . . . ?
 C3 C2 C1 O3 178.7(12) . . . . ?
 C3 C2 C1 O3 -178.7(12) 6_655 . . 6_655 ?
 C3 C2 C1 O3 1(2) 6_655 . . . ?
 C3 C2 C1 O3 -1(2) . . . 6_655 ?
 C3 C2 C3 C4 1(3) 6_655 . . . ?
 C7 C6 C5 O5 166.1(13) 7_556 . . 7_556 ?
 C7 C6 C5 O5 -13.9(13) . . . 7_556 ?
 C7 C6 C5 O5 -13.9(13) 7_556 . . . ?
 C7 C6 C5 O5 166.1(13) . . . . ?
 C7 C6 C7 C8 1.1(12) 7_556 . . . ?
 C8 N2 C8 C7 1.2(13) 7_556 . . . ?
 C10 N2 C10 C9 5(3) 7_556 . . . ?
 C9 C6 C5 O5 -45(2) . . . 7_556 ?
 C9 C6 C5 O5 135(2) . . . . ?
 C9 C6 C5 O5 135(2) 7_556 . . 7_556 ?
 C9 C6 C5 O5 -45(2) 7_556 . . . ?
 C9 C6 C9 C10 5(2) 7_556 . . . ?

_shelx_SHELXL_version_number      '2014/7'
_olex2_submission_special_instructions 'No special instructions were received'
_platon_squeeze_details
;
;
loop_
  _platon_squeeze_void_nr
  _platon_squeeze_void_average_x
  _platon_squeeze_void_average_y
  _platon_squeeze_void_average_z
  _platon_squeeze_void_volume
  _platon_squeeze_void_count_electrons
  _platon_squeeze_void_content
 1 -0.029 0.294 0.343 3529 415 ' '
